# Supplementary material
Source: publisher figshare collection journal article supplement (https://frontiersin.figshare.com/ndownloader/files/21490053)
Supplement: Supplementary file [file 21490053]

## pLenti-UTR-Luc:

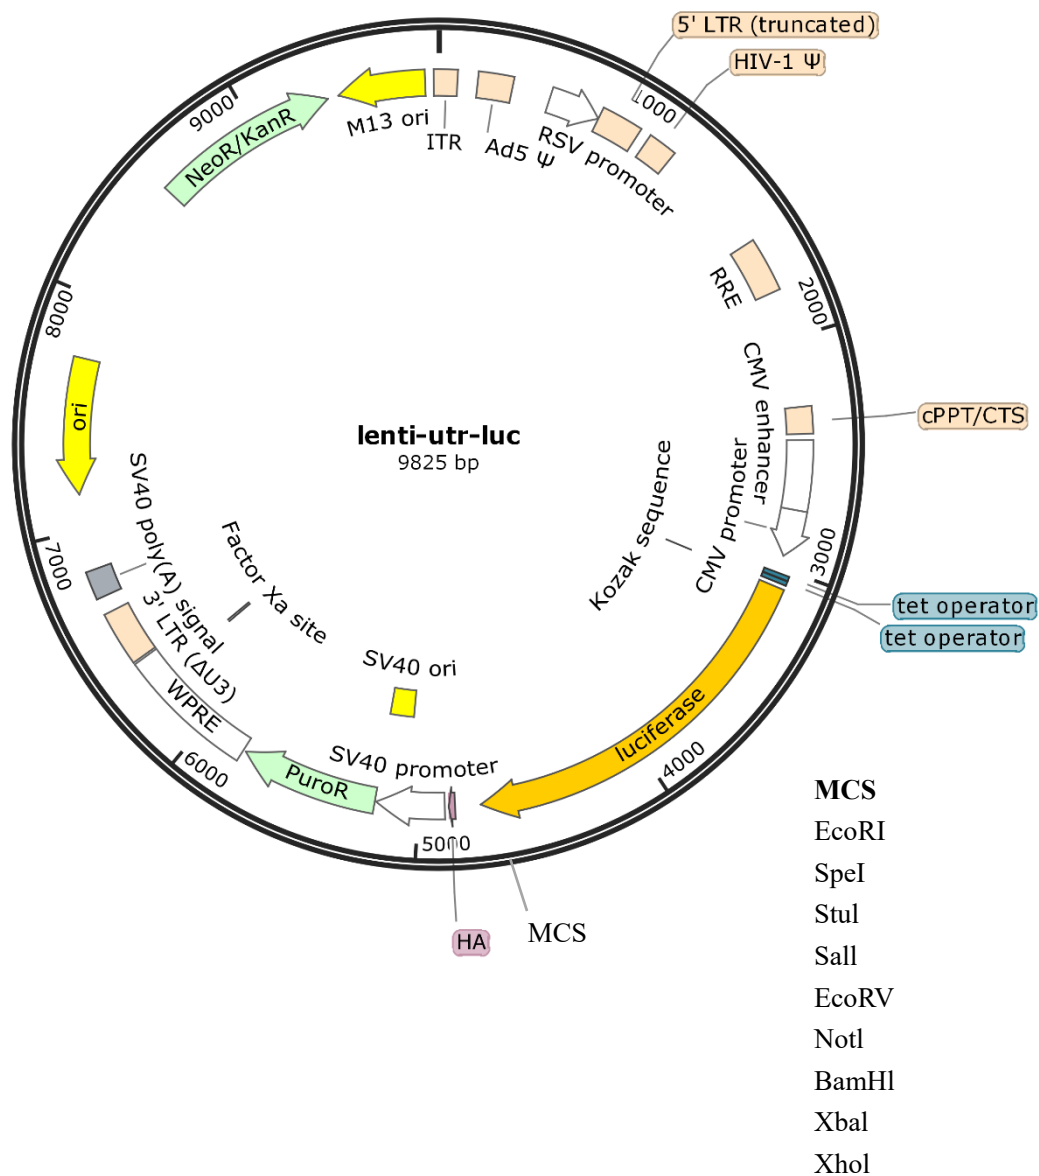

## Sequence of pLenti-UTR-Luc:

```

ttttgattgaagccaatatgataatgaggggtggagtttgtgacgtggcgccggggtgggaacggggcggtgacgtagtagtgtggc
ggaagtgtgatgttgaagtgtggcggaacacatgtaagcgacggatgtggcaaaagtacgtttttggtgtgcgcgggtgtacacaggaag
tgacaattttcgcgcggttttaggcggatgtttagtaaaatttggcgtaaccgagtaagatttgccattttcgcgggaaaactgaataaggg
aagtgaatctgaataattttgttactcatagcgcgtaatacggcagacctcagcgttagattattgaagcatttatcagggttattgtctcatga
gcggatacatattgaatgtatttagaaaaataacaaatagggggtccgcgcacatttccccgaaaagtgccacctgacgttaactataacggt
cctaaggtagcgaaaatgtagctttatgaataactctttagtcttgaacatggtaacgatgagttagcaacatgccttacaaggagagaaaaa
gcaccgtgatgccgattggtggaagtaaggtggtacgctgccttattaggaaggcaacagacgggtctgacatggattggacgaacca
ctgaattgccgattgcagagatattgtattaaagtgcttagctcgatacataaacgggtctctctggttagaccagatctgagcctgggagctct
ctggctaactagggaacccactgcttaagcctcaataaagcttgcttgagtgcttcaagtagtgtgtgcccgctctgtgtgactctggttaact

```

agagatccctcagacccttttagtcagtggtgaaaatctctagcagtgggcgccgaacagggacttgaaagcgaaagggaaccagaggag  
ctctctcagcagcaggactcggttgctgaagcgcgcacggcaagagcgagggcgcgactggtagtacgcaaaaaatttgactagc  
ggaggttagaaggagagagatgggtgagagcgtcagtattaaagggggagaattagatcgcatgggaaaaaattcggttaaggcca  
gggggaaagaaaaatataaataaaacatatagtagggcaagcagggagctagaacgattcgagttatcctggcctgttagaacatca  
gaaggctgtagacaaactgggacagctacaacctccctcagacaggatcagaagaacttagatcattatataatacagtagcaacctct  
attgtgtgcatcaaaggatagagataaaagacaccaaggagctttagacaagatagaggagagcaaaacaaaagtaagaccaccgcac  
agcaagcccgtgatctcagacctggaggaggagatatgaggacattggagaagtgaattatataataataaagtagtaaaattgaacca  
ttaggagtagcaccaccaaggcaagagaagagtggtgcagagagaaaaagagcagtggaataggagctttgtcctgggttcttgg  
gagcagcaggaagcactatggcgagcgtcaatgacgctgacggtacaggccagacaattattgtctggtatagtcagcagcagaacaa  
tttctgagggctattgagcgcaacagcatctgttgcaactcacagctctgggcatcaagcagctccaggcaagaatcctggctgtggaag  
atacctaaggatcaacagctcctgggatttgggtgtgcttgaaaactcatttgcaccactgctgtgccttggatgctagttggagtaataa  
atctctggaacagatttggatcacacgacctggatggagtgggacagagaaftaacaattacacaagcttaatacactccttaattgaagaat  
cgcaaaaccagcaagaaaagaatgaacaagaattattggaattagataaattgggcaagtttgggaattggttaacatacaaaattggctgtg  
gtatataaaattattcataatgatagtaggagcttgtaggttaagaatagttttgctgtactttctatagtgaaatagagtaggagggatattc  
accattatcgttcagaccacctcccaaccccgaggggacccgacaggccgaaggaatagaagaagaaggtggagagagagacagag  
acagatccattcgattagtaacggatctcgacggatcgaaagcttgggattcgaafttaaaagaaaaggggggattgggggtacagtgc  
ggggaagaatagtagacataatagcaacagacatacaactaaagaactacaaaaacaaattacaaaaattcaaaatttctgggttttcgaa  
cctagggttccgcttacataacttacggtaaatggcccgcctggctgaccgccaacgacccccgccattgacgtcaataatgacgtatgtt  
cccatagtaacccaatagggactttccattgacgtcaatgggtggagatttaccggtaaactgcccacttggcagtagcatcaagtgtatcatatg  
ccaagtacgccccctattgacgtcaatgacggtaaatggcccgcctggcattatgccagtagacgttatgggactttctacttggcagta  
catctacgttttagtcgctattaccatgggtgatgcggttttggcagtagcatcaatggcggtgtagcggtttgactcacggggatttccaagt  
ctccacccattgacgtcaatgggagttgtttggcaccaaaatcaacgggactttccaaatgtcgtacaactccgccccattgacgcaaat  
gggcggttagcggtgacggtgggaggtctatataagcagagctcgttagtgaaccgtcagatcgctggagacgcatccacgctgtttga  
cctccatagaagaaccgagtttaactccctatcagtagatagatctccctatcagtagatagagtagtagcagccaccatggaagat  
gcaaaaaacattaagaaggggccagcgccattctaccactcgaagacgggacccggcgagcagctgcacaaagccatgaagcgcta  
cgccctgggtcccggcaccatcgctttaccgacgcacatatcgaggtggacattacacgagtagcttcgagatgagcgttcggctgg  
cagaagctatgaagcgctatgggtgaatacaaacatcggtatcggtgtgcagcgagaatagcttgagtttctatgccgtgttgggtgc  
cctgttcatcggtgtggtgtggtggccagctaacgacatctacaacgagcgcgagctgctgaacagcatgggcatcagccagccaccgtc  
gtattcgtgagcaagaaagggtgcaaaagatcctaacgtgcaaaagaagctaccgatcatacaaaagatcatcatatgtagcaagac  
cgactaccagggttccaaagcatgtacaccttcgtgacttccatttgcacccggcttcaacgagtagcacttcgtgcccagagcttcgac  
cgggacaaaacatcgccctgatcatgaacagtagtggtgagtagccgattgccaaggcgtagccctaccgcaccgcaccgcttgtgtcc  
gattcagtagtcccgcgacccatcttcggcaaccagatcatccccgacaccgctatcctcagcgtggtgccatttaccacggcttcggcat  
gttaccacgctgggtcattgtatctcggttctgggtcgtgctcatgtaccgcttcgaggaggagctatttctgcgagcttgaagactata  
agattcaatctccctgctggtgcccacactatttagcttcttcgtaagagcactctcatcgacaagtacacctaagcaacttgcacgagatc  
gccagcgcgggggcgccgctcagcaaggaggtaggtagggcgtggccaaacgcttccacctaccaggcatccgaggggtacggcc  
tgacagaacaaccagcgccattctgatcccccgaaaggggacgacaagcctggcgagtaggcaaggtggtgcccttcttcgaggctaa  
gggtggtggacttgacaccggtaagacactgggtgtgaaccagcgcgggcagctgtgctcgtggcccatgatcatgagcggctacgtt  
aacaaccccgaggctacaaacgctctcatcgacaaggacggctgggtgcacagcgcgacatcgctactgggacgaggacgagcacttc  
ttcatcgtggaccggctgaagagcctgatcaatacaagggtaccaggtagccccagccgaactggagagcactcctgctgaacacccca  
acatcttcgacgcccgggtcgccggcctgcccagcagcatgcccggcgagctgcccggcgagctgctgctggtgaacacggtaaaacc  
atgaccgagaaggagatcgtggactatgtggccagccaggttacaaccgccaagaagctgcggtgtgtgtgttcgtggacgaggtgc  
ctaaaggactgaccggcaagttggacggcgcaagatccgcgagattctattaaggccaagaaggcgggcaagatcgccgtgaattgta  
aggtagccagctgtgtgtggcctgcaggtgaattcactagtagccgtgtgcagatatcgggcccgccggcgtggtatccttagac  
tgcagctcagtagccatagcaggtcccagactacgcttgagtttaaacacgctggtgtgtgaaagtccccaggtccccagcaggcagaa

gtatgcaaagcatgcatctcaattagtcagcaaccagggtgtgaaagtccccaggctccccagcaggcagaagtatgcaaagcatgcatctc  
aattagtcagcaaccatagtcgcccccctaactccgcccacccgcccctaactccgccagttccgccattctccgccccatggctgactaa  
tttttttatttatgagaggccgagccgctcgccctctgagctattccagaagtagtgaggaggctttttggaggccatgaccgagtacaag  
cccacgggtgcgctcgcacccgcgacgacgtccctcgggccgtacgcacccctgcgcgcgttcgccgactaccccgccacgcgcca  
caccgtggaccggaccgccacatcgagcgggtcaccgagctgcaagaactcttctcacgcgcgtcgggctcgacatcggaaggtgtg  
ggtcggggacgacggcgccggtggcggttgaccacgcggagagcgtcgaagcggggggcgggtgttcgccgagatcgcccgcg  
catggccgagttgagcgggtcccggtggcgcgagcaacagatggaagggctcctggcgccgaccggcccaaggagcccgctgg  
ttcctggccaccgtcggtctcgcggaccaccagggaagggcttgggcagcgcgtcgtgtccccggagtggaggcggccgagcg  
cgccgggtgcccgccttctggagacctccgcgccccgaacctcccccttctacgagcggctcggcttcaccgtcaccgccgacgtcgag  
gtccccgaaggaccgcgacctgggtcatgacctgcaagccgggtgcctgaacgcgttcggaaatcaacctctggattacaaaattgtga  
aagattgactggtattcttaatatgtgtccttttacgctatgtgatalcgtctttaatgcctttgtatcatgctattgctcccgtatggcttcatt  
ttctcctctgtataaatcctgggtgtctctttatgaggagttgtggccggtgtcaggcaacgtggcgtggtgtgactgtgtgtgtgacgc  
aacccccactggtggggcattgccaccacctgtcagctccttccgggactttcgcttccccctcctattgccacggcggaactcatcgccg  
cctgccttccccgctgctggacaggggctcggctgttgggactgacaattccgtggtgtgtcggggaagctgacgtccttccatggctgct  
cgctgtgttgcacctggattctgcggggacgtccttctgtacgtcccttcggccctcaatccagcggaccttctcccgccgctgctgc  
cggtctgcgcccttcccgctcgccttcgcccctagacgagtcggatctcccttggcccgccctcccgctgctggatggaagggt  
aattcactcccaagaatacaagatctgttttgcctgtactgggtctctctggttagaccagatctgagcctgggagctctctgctaactagg  
aacccactgcttaagcctcaataaagctgccttgagtgtcaagtagtgtgtgcccgtctgtgtgtgactctggttaactagatccctcaga  
cccttttagtcagtgtgaaaatctctagcagtagtagttcatgtcatcttatttactgattttataacttgcaaagaaatgaatatcagagagtga  
aggaactgtttattgcagcttataatggttacaataaagcaatagcatcacaatttcacaaataaagcatttttctactgcattctagtgtgtgtt  
gtccaaactcatcaatgtatcttatcatgtctggcatctatgtcgggtcgagagaagagtaataaagcattatgggtattatgggtctgcat  
taatgaatcgccaacgatcccgggtgtgaaataccgcacagatgcgtaaggagaaaaataccgcacagcgctcttccgcttctcgtcact  
gactcgtcgcctcggctgctcggctgcggcgagcgggtatcagctcactcaaggcggtaataacggtatccacagaatcaggggataacgc  
aggaagaacatgtgagcaaaaggccagcaaaaggccaggaaaccgtaaaaggccgctgtgtggcgttttccataggctccgccccct  
gacgagcatcacaaaaatcgacgtcaagtcagaggtggcgaacccgacaggactataaagataccaggcgtttccccctggaagctccc  
tcgtcgcgtctcctgttccgacctgcggttaccggatacctgtccgcttctccttcgggaagcgtggcgtttctcatagctcacgtgta  
ggtatctcagttcgggtgtaggtcgttcccaagctgggtgtgtgcacgaacccccgttcagcccgaccgtgcgcttatccggttaacta  
tcgtcttgagtccaacccggtgaagacacgacttatcgccactggcagcagccactggttaacaggattagcagagcgagggtatgtagcggtg  
ctacagagttcttgaagtgtgtgctaactacggctacactagaaggacagtagtttggtatctgcgtctgctgaagccagttaccttcgaaaa  
agagttggtagctcttgatccggcaacaaccaccgctggtagcgggtgtgtttttgttgcaagcagcagattacgcgagaaaaaaggat  
ctcaagaagatcctttgatcttttctacgggtctgacgtcagtggaacgaaaactcacgttaagggttttggtcatgagattacaaaaagga  
tcttcacntagatccttttaataaaaaatgaagtttaaatcaatctaaagtatatatgagtaaaacttggtctgacagttaccaatgcttaacagtga  
ggcacctatctcagcgtctgtctatttctgttcatccatagttgcctgactccccgtcgtgtagataactacgatacgggagggttaccatctgg  
ccccagtgtgcaatgataccgcgagaccacgtcaccggctccagatttatcagcaataaaccagccagccggaaggggcgcgagcgag  
aagtggctcctgcaactttatccgctccatccagctatfaattgttccgggaagctagagtaagtagttccagtttaatggttgcgaacgtt  
gttgaanaaggatcttcacntagatccttttcacgtagaaagccagtcgcagaaacgggtgctgaccccgatgaatgtcagctactgggtat  
ctggacaagggaacgcaagcgcaaagagaaagcaggtagcttcagtgagggttacatggcgatagtagctggcggttttatggaca  
gcaagcgaaccggaattgccagctggggcgccctctggtgaaggttggaagccctgcaaaagtaactggatggctttctcggcccaagga  
tctgatggcgaggggatcaagctctgatcaagagacaggtatgagatcgtttcgtatgattgaacaagatgattgcacgcaggttctccgg  
ccgcttgggtggagaggctattcggctatgactgggcacaacagacaatcggtgctctgatcccgctgttccggctgtcagcgagggg  
cgccccgttctttgtcaagaccgacctgtccggtgcccgtgaatgaactgcaagacgagcgagcgcggtatcgtggctggccacgacggg  
cgttccttgcgcagctgtgtcgtcaggtgtcactgaagcgggaaggaggtggctgtattgggcgaagtccggggcaggtatcctgtcatc  
tcaccttgcctcctgccgagaaagtatccatcatggctgatgaatcgggcggtgcatacgttgatccggctacctgcccattcgaccacaa  
gcgaacatcgcatcgagcgagcagctactcggtatggaagccggtctgtcgtatcaggtatctggacgaagagcatcaggggctcgcg

ccagccgaactgttcgccaggctcaaggcgagcatgcccgcggcgaggatctctgtgacccatggcgatgcctgctgccgaatatcat  
 ggtggaaaatggccgctttctggattcatcgactgtggccggctgggtgtggcggaccgctatcaggacatagcgttggtacccgtgatatt  
 gctgaagagcttggcggcgaaatgggctgaccgcttctctgtgctttacgggtatcgccgctcccattcgcagcgcacgccttctatgccttct  
 tgacgagttcttgaattttgttaaaatgttgaatcagctcatttttaaccaataggccgaaatcggaacatccctataaatcaaaagaata  
 gaccgcgatagggttgagtgtgtccagtttgaacaagagtcactattaaagaacgtggactccaacgtcaaagggcgaaaaaccgtcta  
 tcagggcgatggccactacgtgaacctacacccaaatcaagtttttgcggctgaggtgccgtaaagctctaaatcggaaccctaaaggag  
 ccccgatttagagcttgacggggaaagccggcgaacgtggcgagaaagggaaggaaagcgaaaggagcgggcgctagggcgct  
 ggcaagtgtagcggtcacgctgcgcgtaaccaccacacccgcgcgctaatacgccgctacagggcgcgctcattcgccattcaggatcga  
 attaatcttaattaacatcatcaataatatacctt

# pLenti-UTR-GFP:

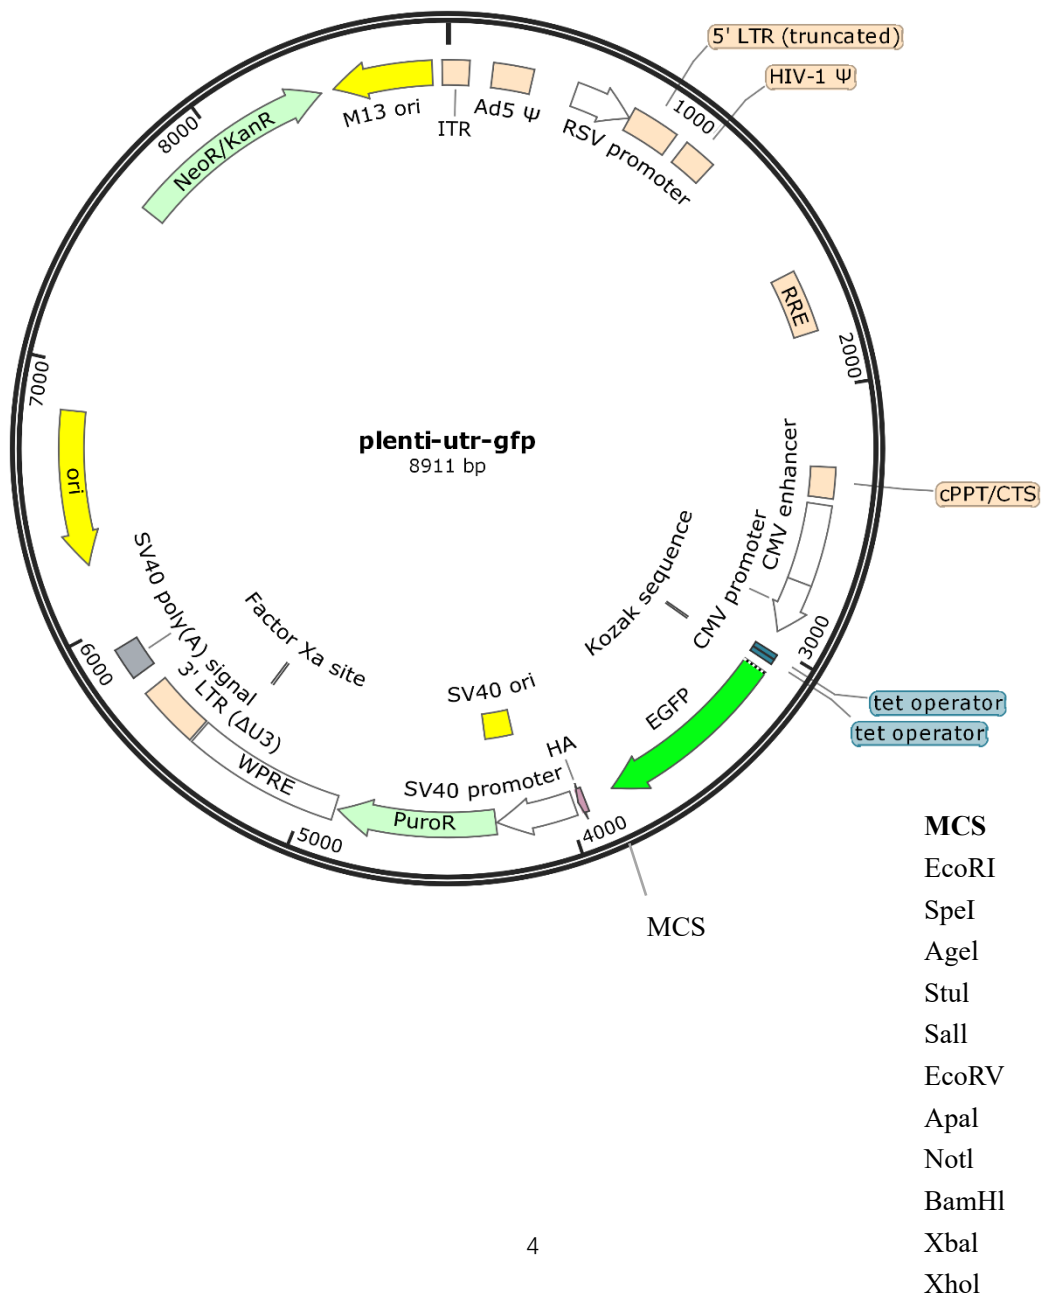

### Sequence of pLenti-UTR-GFP:

ttttgattgaagccaatatgataatgagggggtggagtttgtgacgtggcgcgggcggtgggaacggggcggggtgacgtagtagtggc  
ggaagtgtgatgttgcaagtgtggcggaacacatgtaagcgacggatgtggcaaaagtacgttttgggtgcgccggttacacaggaag  
tgacaattttcgcggttttagcggtgtgttagtaaatggggtgtaaccgagtaagattggccattttcgcgggaaaactgaataagagg  
aagtgaatctgaataatttgtgttactcatagcgcgtaatacggcagacctcagcgctagattattgaagcatttatcagggttattgtctcatga  
gcggtacatatattgaatgtatttagaaaaataaacaatataggggttcgcgcacatttccccgaaaagtccacctgacgttaactataacggt  
cctaaggtagcgaaaatgtatgtcttgaataactctgtatgttcgaacatggtaacgatgagtagcaacatgccttacaaggagagaaaaa  
gcaccgtgatgccgattggtggaagtaaggtggtacgacgtgccttattaggaaggcaacagacgggtctgacatggattggacgaacca  
ctgaattgccgattgcagagatattgtatttaagtcctagctcgatacataaacgggtctctctggttagaccagatctgagcctgggagctct  
ctggtaactaggaacccactgcttaagcctcaataaagcttccttgagtgttcaagtagtgtgcccgtctgtgtgactctggttaact  
agagatccctcagacccttttagtcagtggtgaaaatcttagcagtgggcgccgaacagggactgaaaagcgaaagggaaccagaggag  
ctctctcagcgaggactcggcttgtaagcgcgacggcaagaggcgaggggcgggcgactggtgagtacgcaaaaaatttgactagc  
ggaggttagaaggagagagatgggtgagagcgtcagttataagcgggggagaattagatcgcatgggaaaaaattcggttaaggcca  
gggggaaagaaaaataataaataacatagtagtggaagcagggagctagaacgattcgagttaatcctggcctgttagaaacatca  
gaaggctgtagacaaatactgggacagctacaacatcccttcagacaggatcagaagaacttagatcattatataatacagtagcaaccctct  
attgtgtgcatcaaaggatagagataaaagacaccaaggagcctttagacaagatagaggagcaaaacaaaaagtaagaccaccgcac  
agcaagcccgtgatcttcagacctggaggaggagatatgaggacattggagaagtgaattatataataataaagtagtaaaattgaacca  
ttaggagtagcaccaccaaggcaagagaagagtggtgcagagagaaaaagagcagtggaataggagctttgtccttgggttcttgg  
gagcagcaggaagcactatggcgcgagcgtcaatgacgctgacggtacagggcagacaattattgtctgtatagtcagcagcagaacaa  
tttctgagggtattgaggcgcaacagcatctgttgcaactcacagctctggggcatcaagcagctccaggcaagaatcctggctgtggaag  
atacctaaggatcaacagctcctggggatttgggtgctctggaaaactcattgcaccactgctgtgcttggatgctagttggagtaataa  
atctctggaacagatttgaatcacacgacctggatggagtgggacagagaaattaacaattacacaagcttaatacactccttaattgaagaat  
cgaaaaccagcaagaaaagaatgaacaagaattattggaattagataaattgggcaagtttgggaattggttaacatacaaaattggctgtg  
gtatataaaattattcataatgatagtaggagccttggtaggtttaagaatagttttgctgtactttctatagtaataagattaggcagggatattc  
accattatcgtttcagaccacctcccaaccccgaggggacccgacagggccgaagggaatagaagaagaaggtggagagagagacagag  
acagatccattcgttagtgtaacggatctcgacggatcgaaagcttgggattcgaattaaaagaaaagggggattgggggtacagtgca  
ggggaaagaatagtagacataatagcaacagacatacaaaactaaagaactacaaaaaatacaaaaattcaaaatttcgggttttcgaa  
cctagggttccgcgttacataacttacggttaattggcccgcctggctgaccgcccacgacccccgccattgacgtcaataatgacgtatgtt  
cccatagtaacgccaatagggactttcattgacgtcaatgggtggagtatttacggtaaaactgcccacttggcagtagcatcaagtgtatcatatg  
ccaagtacgccccctattgacgtcaatgacggtaaatggcccgcctggcattatgccagtagatgaccttatgggactttcctacttggcagta  
catctacgttttagtcacgtattaccatggtgatgcggttttggcagtagcatcaatggcggtgtagcggtttgactcaggggatttccaagt  
ctccacccattgacgtcaatgggagttgttttggcaccaaaatcaacgggactttccaaaatgtcgtacaactccgccccattgacgcaaat  
ggggggtaggcgtgacggtgggaggtctatataagcagagctcgttttagtgaaccgtcagatcgctggagacgccatccacgctgttttga  
cctccatagaagaaccgagtttaaaactccctatcagtgatagagatctccctatcagtgatagagagtagccccgggatcgatcaattgccgg  
tcgcccatggtgagcaagggcgaggagctgttcacgggggtggtgcccctctggtcgagctggacggcgacgtaaacggccacaagt  
tcagcgtgtccggcgaggggcgaggcgatccacctacggcaagctgaccctgaagttcatctgcaccaccggcaagctgcccggtccct  
ggccacccctctgtgaccacctgacctacggcgtgcagtgcttcagccgctaccccgaccacatgaagcagcagcacttctcaagtccgcc  
atggccgaaggctacgtccaggagcgaccatcttctcaaggacgacggcaactacaagaccgcgccgaggtgaagttcaggggcgac  
accctggtgaaccgcatcgagctgaaggcgatcgactcaaggaggacggcaacatcctggggcacaagctggagtacaactacaacagc  
cacaacgtctatatcatggccgacaagcagaagaacggcatcaaggtgaactcaagatccgccacaacatcgaggacggcgagcgtgcag  
ctcgccgaccactaccagcagaacacccccatcgcgacggccccgtgctgctgcccgacaaccactacctgagcaccagtcgccctg

agcaagacccaacgagaagcgcatcacatggctcgtgaggtcgtgaccgccggggatcactctcgcatggacgagctgtac  
aagtaagtacgtaggtacccagtggtggctgcaggtgaattactagtaggctgtcgacgatcggcccgccgct  
ggatcctctagactgcagctcagtagccatagcgtccagactacgcttgagtttaaacacgctggtgtgaaagtccccaggctcccc  
agcaggcagaagtatgcaaagcatgcatctcaattagtcagcaaccaggtgtgaaagtccccaggctccccagcaggcagaagtatgcaa  
agcatgcatctcaattagtcagcaaccatagtcggcccttaactccgcccatactccgcccagttccgcccattctccgccc  
atggctgactaattttttttatgtcagaggccgaggccgctcggcctctgagctattccagaagttaggaggctttttggaggccatg  
accgagtacaagcccacggtgcgctcggcaccgcgacgacgtccctgggcccgtacgcaccctcgccgcccgttcgcccactaccc  
cgccacgcgccacaccgtggaccggaccgccacatcgagcgggtcaccgagctgcaagaactctctcacgcgctcgggctcgcacat  
cggcaaggtgtgggtcgcggacgacggcgccgcggtggcgtctggaccacgccggagagcgtcgaagcggggcggtgttcgcga  
gatcggcccgcgcatggccgagttgagcgggtcccggtggcgcgcagcaacagatggaagggtcctggcgccgaccggcccaag  
gagcccgctggttctggccaccgtcggcgtctcggccaccaggggcaagggtctgggcagcggcgtcgtctccccggagtggga  
ggcgccgagcgcggcggtgcccgcctctggagacctccgcggccgcaacctccctctacgagcggctcggcttcaccgtcac  
cgccgacgtcaggtgcccgaaggaccgcgcacctgggtgcatgaccgcgaagcccggtgcctgaacgcgttcgggaatcaacctctgga  
ttacaaaattgtgaaagattgactggtatttfaactatgtgtccttttacgctatgttgatacgtctttaatgcctttgtatcatgtattgttc  
ccgtatggcttcattttctcctctgtataaatcctggtgctgtctttatgaggagttgtgcccgtgtcaggcaacgtggcgtggtgtgcac  
tgttttctgacgcaacccccactggtgggcatgtccaccacctgtcagctccttcgggacttctgcttccccctccattgtccacggc  
ggaactcatcgccgctgccttgcggctgtgacaggggctcggctgttgggactgacaattccgtgtgtgtcggggaagctgacgt  
cctttccatggctgctcgcctgtgttgcacctggattctgcgggacgtccttctgtacgtcccttcggccctcaatccagcggaccttctt  
cccggcgctgtcggcgctcgtgcgctcttccgctcgccttcgacctcagacgagtcggatctcccttggcgccctccccgctgt  
ccggatggaagggttaattactcccaacgaatacaagatctgttttgcctgtactgggtctctctggttagaccagatctgagcctgggagct  
ctctggcttaactagggaaccactgtttaagcctcaataaagcttgccttgagtgctcaagtagtgtgtgcccgtctgtgtgactctggtaa  
ctagagatccctcagacccttttagtcagtggtgaaaatctctagcagtagtagttcatgtcattattcagtagttataaacttgcagaagatg  
aatacagagagtgagaggaactgtttattgcagcttataatggttacaataaagcaatagcatcacaatttcacaataaagcattttttcac  
tgcatctagtgtgtgttgcacaactcatcaatgtatcttatcatgtctggcatctatgtcgggtgcggagaaaaggtaagaaatggcattatg  
ggattatgggtctgcattaatgaatcgccaacgatccgggtgtgaataccgcacagatgcgtaaggagaaaataccgcatcaggcgtct  
tccgcttctcgtcactgactcgtcgcgtcggctgttgcgtcggcgagcggatcagctcactcaaaggcggttaatacggttatccacag  
aatcaggggataacgcaggaaagaacatgtgagcaaaaggccagcaaaaggccaggaaaccgtaaaaggccgctgtgtggcgttttcc  
ataggctccgccccctgacgagcatcacaataacgacgtcaagtcagaggtggcgaaccggacagactataaagataaccaggcgtt  
tccccctggaagctccctcgtgcgtctcctgttccgacctgcgcttaccggatacctgtccgcttctcccttcgggaagcgtggcgcttcc  
tcatagctcacgctgtaggtatctcagttcgggtgtaggtcgttccgctcaagctgggctgtgtgcacgaacccccgttaccggcaccgctgc  
gccttatccggttaactatcgtctttagtccaacccggtaagacacgacttatccactggcagcagccactggttaacaggattagcagagcg  
aggtatgtagggcgtgtacagagttcttgaagtgtggcctaactacggctacactagaaggacagtagtttggtagtctgcgtcgtgaagc  
cagttaccttcgaaaaagagttgtagctcttgatccggcaaaacaccaccgctgtagcggtgtttttgttgcagcagcagattacg  
cgagaaaaaaggatctcaagaagatcctttagtcttttctacggggtctgacgtcagtggaacgaaaactcaggttaagggttttggtag  
gagattatcaaaaaggatcttcacctagatccttttaattaaaaatgaagttttaaataaatctaaagtatatagtaaaacttggtctgacagtta  
ccaatgcttaatacagtgaggcacctatctcagcagctgtctatttctgtcatccatagttgcctgactccccgtcgtgtagataactacgatacgg  
gagggttaccatctggccccagtgctgcaatgataccgcgagaccacgctcaccggtccagatttatcagcaataaaccagccagccg  
gaaggccgagcgcagaagtggtcctgcaactttatccgctccatccagcttataattgttgcgggaagctagagtaagtagttcgcaggt  
taatagtttgcgaacgtgttgaaaaaggatcttcacctagatccttttcacgtagaaagccagtcgcagaaacggtgctgaccccgatga  
atgtcagctactgggctatctggacaagggaacgaagcgaagagaaagcaggtagcttgcagtgggcttcatggcgatagctaga  
ctggcggtttttatggacagcaagcgaaccggaaattgccagctggggcgccctctggttaagggtgggaagccctgcgaagtaaaactggatg  
gctttctcggccaaggatctgatggcgaggggatcaagctctgatcaagagacaggtaggatcgttgcagtagtgaacaagatgg  
attgcacgcaggttctccggccgcttgggtggagaggctattcggctatgactgggcacaacagacaatcggtcgtctgatcccgctgtt  
ccggctgtcagcgcagggcgcccggttcttttgcagaccgacctgtccggtgcctgaatgaactgcaagacgaggcagcgcggctat

cgtggctggccacgacggcggttccttgcgcagctgtgctcgcgttgcactgaagcgggaagggaaggactggctgctattggcggaagtgcc  
ggggcaggatctcctgtcatctcaccttgcctcctgccgagaaagtatccatcatggctgatgcaatgcggcggctgcatacgttgatccggct  
acctgccattcgaccaccaagcgaaacatcgcacgcagcgagcacgtactcggatggaagccggcttctgcgatcaggatgatctggacg  
aagagcatcaggggctcgcgccagccgaactgttcgccaggctcaaggcgagcatgccgacggcgaggatctcgtcgtgacctatggc  
gatgcctgcttgcgaatatcatggtggaaaatggccgcttttctggattcatcgcactgtggccggctgggtgtggcggaccgctatcaggaca  
tagcgttggctacccgtgataattgctgaagagcttggcggcgaatgggctgaccgcttcctcgtgctttacggtatcgccgctcccgattcgca  
gcgcacgccttctatgccttcttgacgagttcttgaatttgttaaaattttgttaaatcagctcatttttaaccaataggccgaaatcgcaa  
catccctataaatcaaaagaatagaccgcgatagggttgagtgtgtccagtttgaacaagagtccactattaaagaacgtggactccaacg  
tcaaaggcgaaaaaccgtctatcagggcgatggccactacgtgaacctacccaaatcaagtttttgcggtcgaggtgccgtaaagctc  
taaacggaaccctaaaggagccccgatttagagcttgacggggaaagccggcgaacgtggcgagaaaggaagggaagaaagcgaa  
aggagcgggcgctaggcgctggcaagtgtagcggtcacgctgcgcgtaaccaccacaccgcgcgcttaatgcgcgctacagggcgc  
gtccattcgccattcaggatcgaattaattcttaattaacatcatcaataatatacctt
